# Supplementary material for: Assessment of the effects of storage temperature on fatty acid analysis using dried blood spot cards from managed southern white rhinoceroses (Ceratotherium simum simum): implications for field collection and nutritional care
Source: PeerJ. 2022 Feb 14;10:e12896. doi: 10.7717/peerj.12896 (PMC8852271; doi:10.7717/peerj.12896)
Supplement: Supplemental Information 1 — The values for seven rhinos with DBS samples collected and either immediately sent for analysis or stored at two different temperatures. These values were used for statistical comparisons of three sample groups. [file peerj-10-12896-s001.xlsx]

## Sheet: Sheet1
Fatty Acid (%) Profile of Initial Dried Blood Spot (DBS) Samples (n=7), Room Temperature Stored DBS Samples (n=7), and -20℃ Stored DBS Samples from Human Managed Southern White Rhinoceroses (Ceratotherium simum)
Type	Initial								Room Temperature								Frozen at -20℃
Rhino ID	1	2	3	4	5	6	7	Average	1	2	3	4	5	6	7	Average	1	2	3	4	5	6	7	Average
myristic acid (14:0)	0.981484	0.910406	0.820171	0.899981	0.957395	1.19882	0.607323	0.910798	0.647798	0.621138	0.725579	0.801604	0.802932	0.8198	0.490402	0.701322	0.47059	0.483206	0.626676	0.401754	0.768041	1.61682	0.588425	0.70793
palmitic acid (16:0)	16.3576	15.3428	14.4462	13.5611	15.1587	15.4307	13.7497	14.8638	16.8673	16.3258	16.3018	15.104	17.1732	16.6158	14.5834	16.1388	15.341	15.1694	14.7997	13.5031	15.5223	16.7494	13.3235	14.9155
palmitoleic acid (16:1w7)	2.40862	1.92882	1.29735	1.93217	1.7005	1.29422	2.01835	1.79715	1.44564	0.682771	2.41515	1.2311	2.63735	1.47589	1.84149	1.67563	1.15432	1.8346	1.2639	1.37478	3.52194	4.80759	1.60617	2.22333
stearic acid (18:0)	11.5132	11.8916	12.4065	11.5384	11.8494	12.3072	13.4254	12.1331	13.8934	15.6716	12.8474	12.5317	13.4145	14.4878	17.3112	14.3082	14.5404	15.2956	12.9074	15.039	13.8444	12.0149	12.3518	13.7134
oleic acid (18:1w9)	34.5163	35.5969	36.3847	32.2137	33.7117	33.8429	40.1206	35.1981	35.6769	37.5196	35.9877	33.9362	34.6523	37.0857	40.6569	36.5022	34.2068	33.6579	34.7235	33.8835	32.8394	31.5405	38.4659	34.1882
linoleic acid (18:2w6)	25.2393	25.0518	24.9046	29.6596	29.9149	28.8997	22.4344	26.5863	24.1341	22.1451	21.2809	25.684	21.5161	20.2656	16.7922	21.6883	25.8385	25.1805	23.9235	25.1712	23.0415	22.2326	23.837	24.175
γ-linolenic acid (18:3w6)	0.12301	0.785427	0.135321	0.123717	0.0922646	0.530751	0.146797	0.276755	0.0842176	0.102079	0.173097	0	0.100222	0.191965	0.134172	0.11225	0.149383	0	0.145817	0	0	0	0.137421	0.0618029
α-linolenic acid (18:3w3)	5.12524	5.00292	5.03849	5.93793	2.12388	2.34448	3.80935	4.19747	1.45919	1.5722	4.26532	4.88385	4.30276	4.00821	2.67733	3.30984	2.00367	2.11512	5.61082	4.68773	4.90486	4.89694	4.8132	4.14748
stearidonic acid (18:4w3)	0	0	0	0	0	0	0	0	0.166886	0.201268	0.342625	0.302768	0.202759	0.2063	0.312074	0.247812	0.191259	0.240863	0.267171	0.248471	0.255195	0.970389	0.226496	0.342835
arachdic acid (20:0)	0.0269027	0.0447122	0.114714	0.0650121	0.0413393	0.110282	0.0963489	0.0713302	0.2724	0.349186	0.440772	0.254911	0.248074	0.28587	0.428498	0.325673	0.236985	0.270971	0.293792	0.247279	0.189108	0.244901	0.144209	0.232463
paullinic acid (20:1w7)	0.244722	0.208478	0.225307	0.233607	0.0856742	0.188361	0.0866058	0.181822	0.937236	0.581848	0.562119	0.560366	0.558827	0.583791	0.593054	0.62532	0.924561	0.517756	0.520671	0.569785	0.533833	0.463876	0.216893	0.535339
eicosenoic acid (20:2w6)	0.296115	0.295747	0.330175	0.308322	0.51085	0.404975	0.343825	0.355716	0.591459	0.651569	0.333702	0.377728	0.33275	0.431506	0.373268	0.441712	0.640442	0.617129	0.360944	0.489494	0.342381	0.310893	0.390076	0.450194
mead acid (20:3w9)	0.0684627	0.156223	0.0757891	0.0531256	0.0824789	0.139448	0.0974315	0.096137	0	0	0	0	0	0	0	0	0	0	0	0	0	0	0	0
h-γ-linolenic acid (20:3w6)	0.244536	0.233258	0.313918	0.300802	0.348089	0.281022	0.17581	0.271062	0.2815	0.313362	0.291588	0.356241	0.248074	0.232685	0.155753	0.268458	0.327967	0.287588	0.265492	0.319228	0.292927	0.778625	0.200336	0.353166
arachidonic acid (20:4w6)	1.84237	1.50702	1.87595	1.99039	2.15763	2.00179	1.18087	1.79372	1.74747	1.86688	2.00614	1.98704	1.73552	1.47423	1.31829	1.73365	2.17014	2.41225	2.35849	2.20078	2.18445	1.42527	2.0181	2.10993
eicosatrienoic acid (20:3w3)	0.187577	0.190162	0.127994	0.148703	0.125216	0.12851	0.0866058	0.14211	0.0995123	0	0.154895	0.148943	0.19912	0.168905	0.121962	0.127619	0.123469	0.12257	0.152052	0.171457	0.248274	0.0482088	0.115897	0.140275
eicosatetraenoic acid (20:4w3)	0.0693903	0.0676071	0.0892984	0.138272	0.0567167	0	0.108041	0.0756179	0.181213	0.0200305	0.360827	0.275666	0.252208	0.284208	0.286659	0.237259	0.202245	0.278868	0.353749	0.171159	0.202057	0.319249	0.328651	0.26514
eicosapentaenoic acid (20:5w3)	0.155108	0.096697	0.143793	0.106251	0.132206	0.089927	0.172129	0.128016	0.222451	0.201461	0.321211	0.222681	0.202759	0.149999	0.127499	0.206866	0.0966155	0.169624	0.178913	0.230893	0.14144	0.400883	0.155302	0.196239
behenic acid (22:0)	0.261605	0.279586	0.372535	0.295223	0.263613	0.42533	0.453814	0.335958	0.279951	0.344948	0.331561	0.284212	0.596535	0.278183	0.50886	0.374893	0.28872	0.39716	0.3101	0.296139	0.312352	0.197335	0.254311	0.293731
erucic acid (22:1w9)	0	0	0	0	0	0	0	0	0.0795711	0.0211861	0	0	0.0357226	0.0689745	0.108899	0.0449077	0.151918	0.0304369	0.0309381	0.0539247	0.0548123	0.142698	0	0.0663898
docosatetraenoic acid (22:4w6)	0.0233775	0	0	0.0485165	0.136799	0.0580272	0.0246826	0.041629	0.139588	0.150807	0.170599	0.24661	0.152648	0.11842	0.211268	0.169991	0.124032	0.179495	0.185628	0.16818	0.11822	0.19155	0.210436	0.16822
DPA (osbond acid) (22:5w6)	0	0.112589	0.274077	0	0	0	0.136188	0.0746934	0.139007	0.101501	0.258039	0.224879	0.150498	0.198406	0.151494	0.174832	0.0852545	0.105789	0.129748	0.0883353	0.101029	0.125129	0.19868	0.119138
DPA (clupanodonic acid) (22:5w3)	0.0916546	0	0.101205	0.125415	0.14958	0.0847622	0.0909361	0.0919362	0.146364	0.0691438	0.0531782	0.0925397	0.0603646	0.0569248	0.0408905	0.0742009	0.177082	0.120431	0.193543	0.159987	0.120788	0.138627	0.116559	0.146717
docosahexaenoic acid (22:6w3)	0.108538	0.180196	0.22004	0.181209	0.17714	0.136409	0.17083	0.167766	0.130295	0.169296	0.0924373	0.0981556	0.128833	0.175553	0.297024	0.155942	0.160275	0.159588	0.0884973	0.12498	0.128602	0.104988	0.0582796	0.117887
nervonic acid (24:1)	0.114847	0.117168	0.301783	0.138515	0.223871	0.102383	0.128393	0.160994	0.376559	0.317214	0.283379	0.39482	0.296035	0.335316	0.47734	0.35438	0.394349	0.353068	0.308901	0.398775	0.332223	0.27854	0.24239	0.329749
Saturates	29.1408	28.469	28.1601	26.3597	28.2705	29.4723	28.3326	28.315	31.9609	33.3127	30.6471	28.9764	32.2352	32.4874	33.3224	31.8489	30.8777	31.6164	28.9376	29.4873	30.6361	30.8234	26.6623	29.863
Monoenes	34.8759	35.9225	36.9118	32.5859	34.0213	34.1337	40.6712	35.5889	37.0703	38.4399	36.8332	34.8914	35.5428	38.0737	41.8362	37.5268	35.6776	34.5592	35.5841	34.906	33.7602	32.4257	38.9251	35.1197
PUFA	33.5747	33.6796	33.6307	39.1222	36.0077	35.0998	28.9779	34.2989	29.5232	27.5647	30.1046	34.9011	29.5846	27.9629	22.9999	28.9487	32.2903	31.9898	34.2144	34.2319	32.0817	31.9433	32.8064	32.794
HUFA	2.79101	2.54375	3.22207	3.09268	3.36586	2.91989	2.24352	2.88268	3.0874	2.89248	3.70891	3.65275	3.13003	2.85933	2.71084	3.14882	3.46708	3.8362	3.90611	3.635	3.53779	3.53252	3.40224	3.61671
Tot. w3	5.7375	5.53758	5.72082	6.63778	2.76474	2.78409	4.4379	4.80292	2.40591	2.2334	5.59049	6.0246	5.3488	5.0501	3.86344	4.35954	2.95461	3.20706	6.84475	5.79467	6.00122	6.87929	5.81438	5.35657
Tot. w6	27.7687	27.9858	27.8341	32.4313	33.1605	32.1762	24.4425	29.3999	27.1173	25.3313	24.5141	28.8765	24.2358	22.9128	19.1365	24.5892	29.3357	28.7828	27.3696	28.4373	26.0805	25.0641	26.9921	27.4374
Tot. w9	34.6312	35.714	36.6865	32.3522	33.9356	33.9453	40.5845	35.4071	36.133	37.858	36.2711	34.331	34.984	37.4899	41.2432	36.9015	34.7531	34.0414	35.0634	34.3362	33.2264	31.9618	38.7082	34.5844
w6/w3	4.83987	5.0538	4.8654	4.88587	11.9941	11.5572	5.50768	6.9577	11.2711	11.342	4.38496	4.7931	4.53107	4.53711	4.95322	6.54465	9.92878	8.97481	3.99863	4.90748	4.34586	3.64341	4.64229	5.77733
AA/EPA	11.878	15.585	13.0462	18.7329	16.3202	22.2601	6.86038	14.9547	7.85553	9.26673	6.24556	8.92325	8.55954	9.82825	10.3396	8.71693	22.4616	14.2211	13.1823	9.53161	15.4444	3.55532	12.9947	13.0559
Omega 3 HUFA	21.9371	21.0186	21.1768	22.6292	19.04	15.0557	28.0158	21.2676	25.2587	15.9009	26.4915	22.9412	26.9418	29.2233	32.2422	25.5714	21.9114	22.1855	24.7498	23.6169	23.7765	28.6468	22.77	23.951
Omega 6 HUFA	78.0629	78.9814	78.8232	77.3708	80.96	84.9443	71.9842	78.7324	74.7413	84.0991	73.5085	77.0588	73.0582	70.7767	67.7578	74.4286	78.0886	77.8145	75.2502	76.3831	76.2235	71.3532	77.23	76.049
